# Supplementary material for: A simple and cost-effective smartphone-based digital imaging device for the quantification of selected heavy metals in Thai rice
Source: Royal Society of Chemistry journal article supplement (doi:10.1039/d1ay01816g), 2021-12-06
Supplement: d1ay01816g1.pdf [file d1ay01816g1.pdf]

**Table 1.1** The effect of dithizone concentration for copper determination.

| Concentration of dithizone (%w/v) | Images of copper(II)–dithizone complexes (mg L <sup>-1</sup> )                                          | R-squared | Slope of Red value |
|-----------------------------------|---------------------------------------------------------------------------------------------------------|-----------|--------------------|
| 0.0015                            | <br>0.2    0.4    0.8  | 0.6233    | 15.17              |
| 0.0025                            | <br>0.2    0.4    0.8  | 0.7446    | 115.83             |
| 0.0050                            | <br>0.2    0.4    0.8  | 0.9921    | 155.82             |
| 0.0100                            | <br>0.2    0.4    0.8 | 0.9705    | 139.45             |

**Table 1.2** The effect of dithizone concentration for zinc determination.

| Concentration of dithizone (%w/v) | Images of zinc(II)–dithizone complexes (mg L <sup>-1</sup> )                                             | R-squared | Slope of Red value |
|-----------------------------------|----------------------------------------------------------------------------------------------------------|-----------|--------------------|
| 0.0015                            | <br>0.2    0.4    0.8 | 0.9989    | 44.16              |
| 0.0025                            | <br>0.2    0.4    0.8 | 0.9443    | 122.14             |
| 0.0050                            | <br>0.2    0.4    0.8 | 0.9897    | 150.95             |
| 0.0100                            | <br>0.2    0.4    0.8 | 0.0611    | 66.78              |

**Table 1.3** The effect of dithizone concentration for lead determination.

| Concentration of dithizone (%w/v) | Images of Lead(II)–dithizone complexes (mg L <sup>-1</sup> )                                           | R-squared | Slope of Red value |
|-----------------------------------|--------------------------------------------------------------------------------------------------------|-----------|--------------------|
| 0.0015                            | <br>0.2    0.4    0.8 | 0.7989    | 57.76              |
| 0.0025                            | <br>0.2    0.4    0.8 | 0.9403    | 190.02             |
| 0.0050                            | <br>0.2    0.4    0.8 | 0.6097    | 72.45              |
| 0.0100                            | <br>0.2    0.4    0.8 | 0.6611    | 46.78              |

**Table 1.4** The effect of dithizone concentration for cadmium determination

| Concentration of dithizone (%w/v) | Images of Cadmium(II)–dithizone complexes (mg L <sup>-1</sup> )                                          | R-squared | Slope of Red value |
|-----------------------------------|----------------------------------------------------------------------------------------------------------|-----------|--------------------|
| 0.0015                            | <br>0.2    0.4    0.8 | 0.3708    | 19.16              |
| 0.0025                            | <br>0.2    0.4    0.8 | 0.8987    | 140.14             |
| 0.0050                            | <br>0.2    0.4    0.8 | 0.9359    | 206.95             |
| 0.0100                            | <br>0.2    0.4    0.8 | 0.9007    | 120.78             |

**Table 2.1** The effect of dithizone volume for copper determination.

| Volume of dithizone (mL) | Images of copper(II)–dithizone complexes (mg L <sup>-1</sup> )                                          | R-squared | Slope of Red value |
|--------------------------|---------------------------------------------------------------------------------------------------------|-----------|--------------------|
| 0.5                      | <br>0.2    0.4    0.8  | 0.8233    | 59.17              |
| 1.0                      | <br>0.2    0.4    0.8  | 0.8446    | 78.56              |
| 1.25                     | <br>0.2    0.4    0.8  | 0.9721    | 134.52             |
| 1.5                      | <br>0.2    0.4    0.8 | 0.9905    | 163.26             |

**Table 2.2** The effect of dithizone volume for zinc determination.

| Volume of dithizone (mL) | Images of zinc(II)–dithizone complexes (mg L <sup>-1</sup> )                                             | R-squared | Slope of Red value |
|--------------------------|----------------------------------------------------------------------------------------------------------|-----------|--------------------|
| 0.5                      | <br>0.2    0.4    0.8 | 0.1579    | 46.56              |
| 1.0                      | <br>0.2    0.4    0.8 | 0.5446    | 116.78             |
| 1.25                     | <br>0.2    0.4    0.8 | 0.9998    | 179.40             |
| 1.5                      | <br>0.2    0.4    0.8 | 0.9705    | 65.12              |

**Table 2.3** The effect of dithizone volume for lead determination.

| Volume of dithizone (mL) | Images of Lead(II)–dithizone complexes (mg L <sup>-1</sup> )                                            | R-squared | Slope of Red value |
|--------------------------|---------------------------------------------------------------------------------------------------------|-----------|--------------------|
| 0.5                      | <br>0.2    0.4    0.8  | 0.8233    | 181.15             |
| 1.0                      | <br>0.2    0.4    0.8  | 0.6446    | 146.33             |
| 1.25                     | <br>0.2    0.4    0.8  | 0.5712    | 95.72              |
| 1.5                      | <br>0.2    0.4    0.8 | 0.5750    | 99.25              |

**Table 2.4** The effect of dithizone volume for cadmium determination.

| Volume of dithizone (mL) | Images of cadmium(II)–dithizone complexes (mg L <sup>-1</sup> )                                          | R-squared | Slope of Red value |
|--------------------------|----------------------------------------------------------------------------------------------------------|-----------|--------------------|
| 0.5                      | 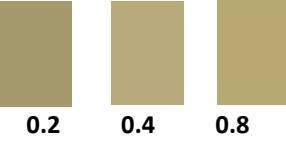<br>0.2    0.4    0.8 | 0.6233    | 59.87              |
| 1.0                      | <br>0.2    0.4    0.8 | 0.7446    | 78.56              |
| 1.25                     | <br>0.2    0.4    0.8 | 0.7721    | 134.23             |
| 1.5                      | <br>0.2    0.4    0.8 | 0.9705    | 163.45             |

**Table 3.1** The effect of buffer pH for copper determination.

| Buffer (pH) | Images of copper(II)–dithizone complexes (mg L <sup>-1</sup> )                                          | R-squared | Slope of Red value |
|-------------|---------------------------------------------------------------------------------------------------------|-----------|--------------------|
| 2           | 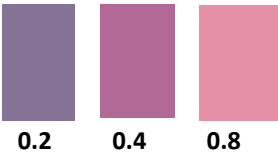<br>0.2    0.4    0.8  | 0.9933    | 173.19             |
| 3.5         | <br>0.2    0.4    0.8  | 0.8634    | 37.77              |
| 4.5         | <br>0.2    0.4    0.8  | 0.9126    | 46.62              |
| 5.5         | <br>0.2    0.4    0.8 | 0.9811    | 50.74              |

**Table 3.2** The effect of buffer pH for zinc determination.

| Buffer (pH) | Images of zinc(II)–dithizone complexes (mg L <sup>-1</sup> )                                             | R-squared | Slope of Red value |
|-------------|----------------------------------------------------------------------------------------------------------|-----------|--------------------|
| 3.5         | <br>0.2    0.4    0.8 | 0.8173    | 78.25              |
| 4.0         | <br>0.2    0.4    0.8 | 0.9443    | 56.11              |
| 4.5         | <br>0.2    0.4    0.8 | 0.9909    | 120.72             |
| 5           | <br>0.2    0.4    0.8 | 0.9248    | 40.19              |

**Table 3.3** The effect of buffer pH for cadmium determination.

| Buffer (pH) | Images of cadmium(II)-dithizone complexes (mg L <sup>-1</sup> )                                        | R-squared | Slope of Red value |
|-------------|--------------------------------------------------------------------------------------------------------|-----------|--------------------|
| 3           | <br>0.2    0.4    0.8 | 0.7335    | 79.23              |
| 4           | <br>0.2    0.4    0.8 | 0.9406    | 60.01              |
| 5           | <br>0.2    0.4    0.8 | 0.9812    | 291.45             |
| 5.5         | <br>0.2    0.4    0.8 | 0.9450    | 126.86             |
